# Supplementary material
Source: publisher figshare collection journal article supplement (https://acs.figshare.com/ndownloader/files/14644781)
Supplement: Supplementary file 1 [file 14644781]

## Supporting Information

### MoS<sub>2</sub>-OH Bilayer Mediated Growth of Inch-Sized Monolayer MoS<sub>2</sub> on Arbitrary Substrates

*Juntong Zhu<sup>1, #</sup>, Hao Xu<sup>2, #</sup>, Guifu Zou<sup>1, \*</sup>, Wan Zhang<sup>1</sup>, Ruiqing Chai<sup>3</sup>, Jinho Choi<sup>1</sup>,  
Jiang Wu<sup>2, \*</sup>, Huiyun Liu<sup>2</sup>, Guozhen Shen<sup>3</sup>, Hongyou Fan<sup>4, 5, \*</sup>*

<sup>1</sup>College of Energy, Soochow Institute for Energy and Materials Innovations, and Key Laboratory of Advanced Carbon Materials and Wearable Energy Technologies of Jiangsu Province Soochow University, Suzhou 215006, China;

<sup>2</sup>Department of Electronic and Electrical Engineering, University College London, Torrington Place, London WC1E 7JE, UK;

<sup>3</sup>State Key Laboratory for Superlattices and Microstructures, Institute of Semiconductors, Chinese Academy of Sciences, Beijing 100083, China;

<sup>4</sup>Center for Integrated Nanotechnology, Sandia National Laboratory, Albuquerque, NM 87185, United States

<sup>5</sup>Chemical and Biological Engineering, Center for Micro-Engineered Materials, University of New Mexico, Albuquerque, NM 87122, United States

\* Corresponding author(s) to whom correspondence should be addressed:

Guifu Zou: [zouguifu@suda.edu.cn](mailto:zouguifu@suda.edu.cn); Jiang Wu: [jiang.wu@ucl.ac.uk](mailto:jiang.wu@ucl.ac.uk); Hongyou Fan: [hfan@sandia.gov](mailto:hfan@sandia.gov)

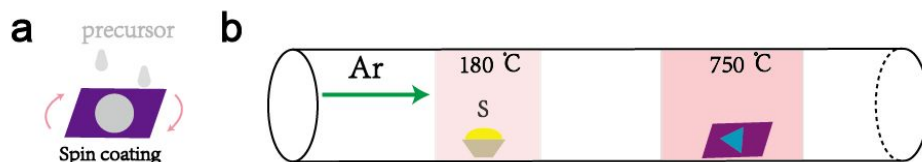

**Figure S1.** Schematic illustration of the MoS<sub>2</sub> growth process including (a) spin-coating precursor solution on the substrate and (b) Annealing process in the tube furnace.

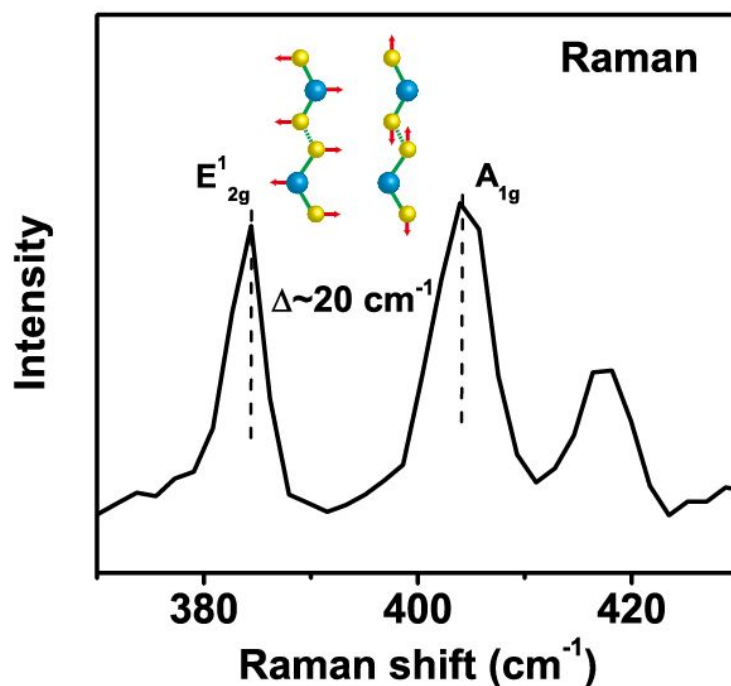

**Figure S2.** Raman spectra of the randomly selected position in the as-grown MoS<sub>2</sub> film. Raman modes of  $E_{2g}^1$  and  $A_{1g}$  are located at 384.3 cm<sup>-1</sup> and 404.6 cm<sup>-1</sup>, respectively, suggesting the monolayer nature. The peak at 418 cm<sup>-1</sup> is resolved to the sapphire substrate.

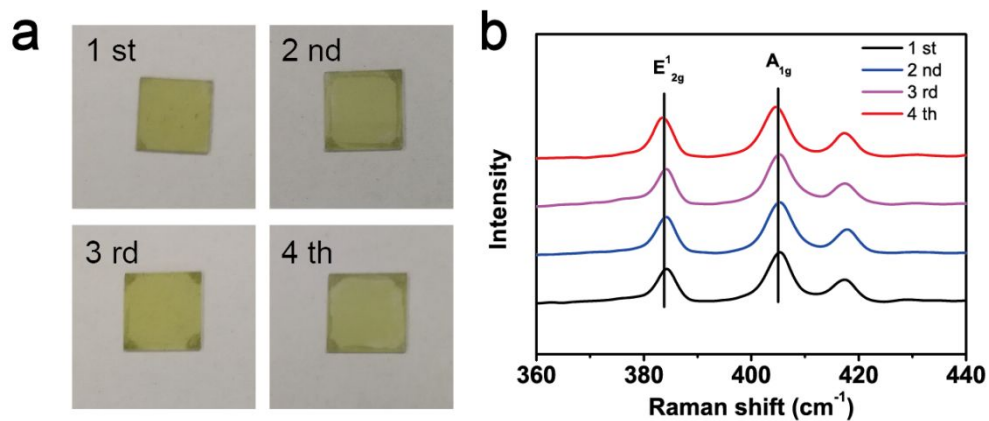

**Figure S3.** Photographs and Raman spectra of as-grown MoS<sub>2</sub> film on the sapphire substrate reused for four times. (a) Photographs show uniform films, (b) Raman spectra of four MoS<sub>2</sub> samples,  $E_{2g}^1$  and  $A_{1g}$  are located at  $\sim 384$  cm<sup>-1</sup> and  $\sim 404$  cm<sup>-1</sup>, respectively, corresponding to the monolayer.

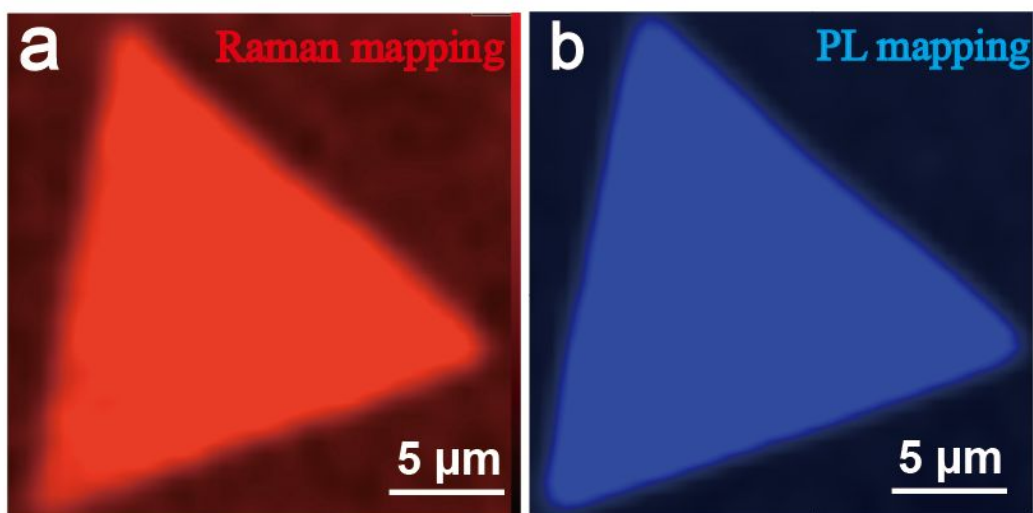

**Figure S4.** The monolayer MoS<sub>2</sub> keeps good uniformity in thickness. (a) Raman intensity map of  $A_{1g}$  peak, (b) PL map of the A-exciton.

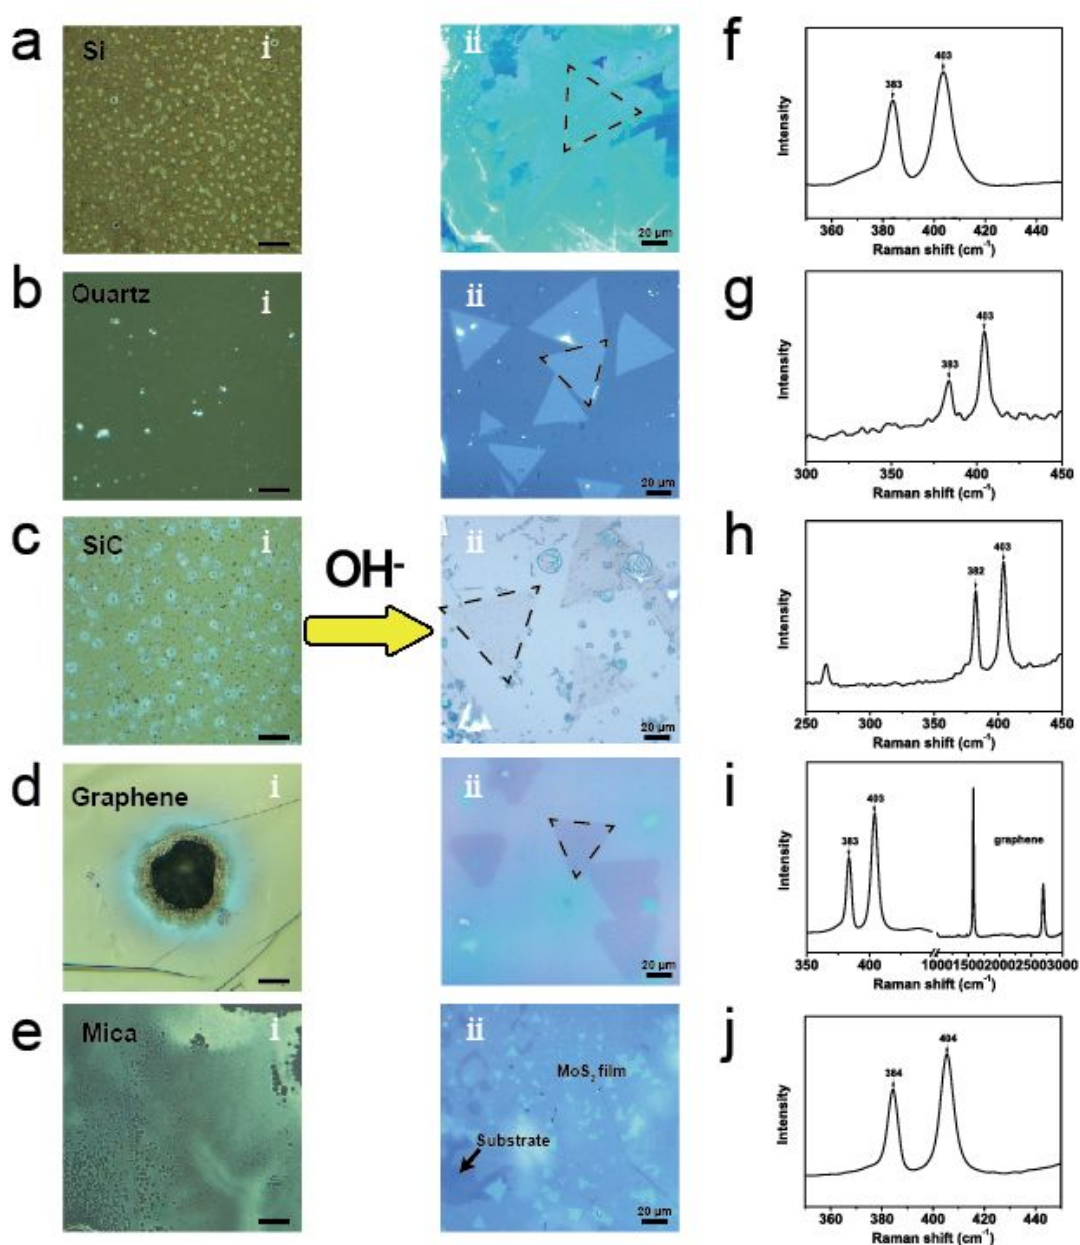

**Figure S5.** Substrate-independent growth of monolayer MoS<sub>2</sub>. Optical microscopy (OM) images of MoS<sub>2</sub> grown on diverse substrates without (i) and with -OH (ii), respectively. (a) Si, (b) quartz, (c) SiC, (d) graphene, (e) mica. (f - j) Corresponding Raman spectra of as-grown MoS<sub>2</sub> with -OH on diverse substrates from ii, respectively.

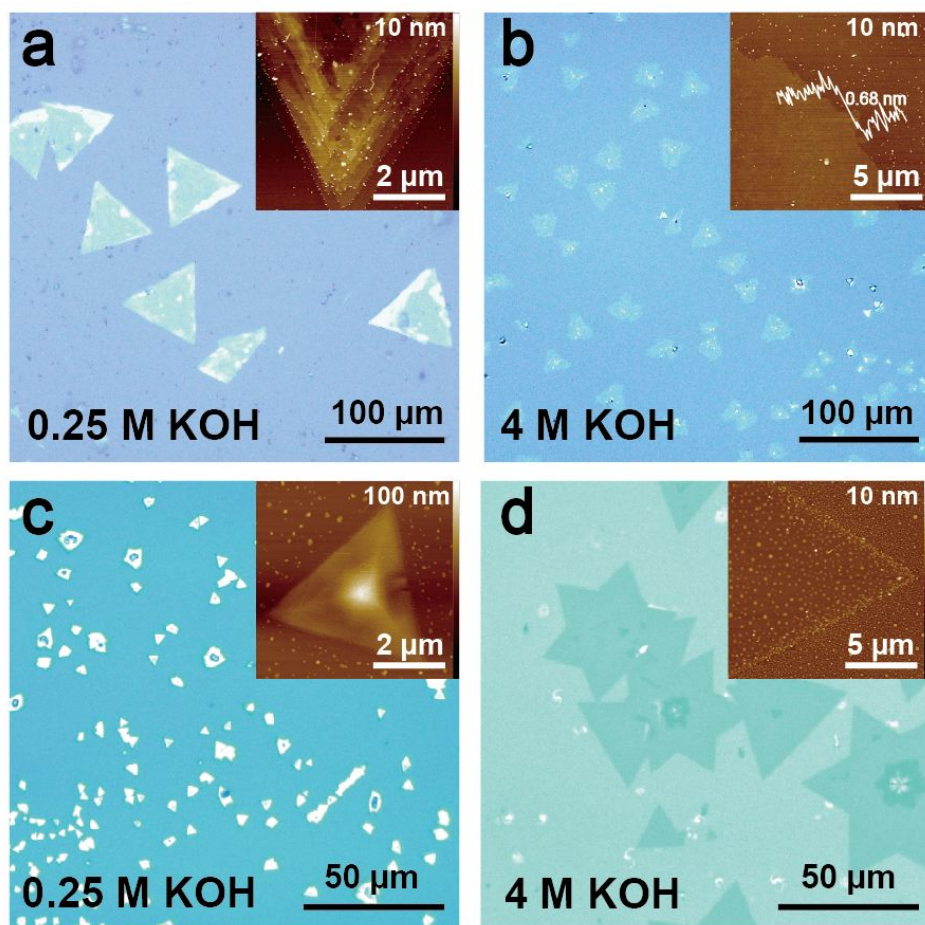

**Figure S6.** Insufficient and excess amount of -OH in the growth of monolayer MoS<sub>2</sub> (a, b) MoS<sub>2</sub> grown on sapphire with 0.25 and 4 M KOH, respectively. (c, d) MoS<sub>2</sub> grown on SiO<sub>2</sub> substrate with 0.25 and 4 M KOH, respectively.

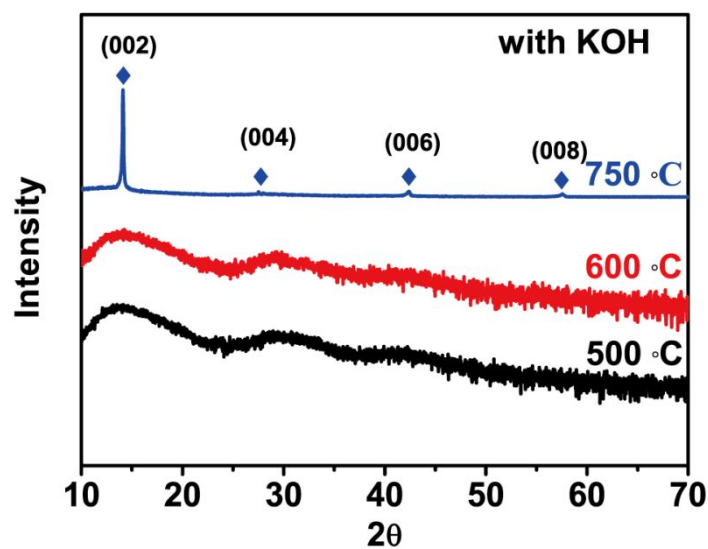

**Figure S7.** XRD patterns of the as-grown MoS<sub>2</sub> samples at different annealing temperature. MoS<sub>2</sub> samples have poor crystal quality at 500 and 600 °C but high-quality crystallinity at 750 °C.



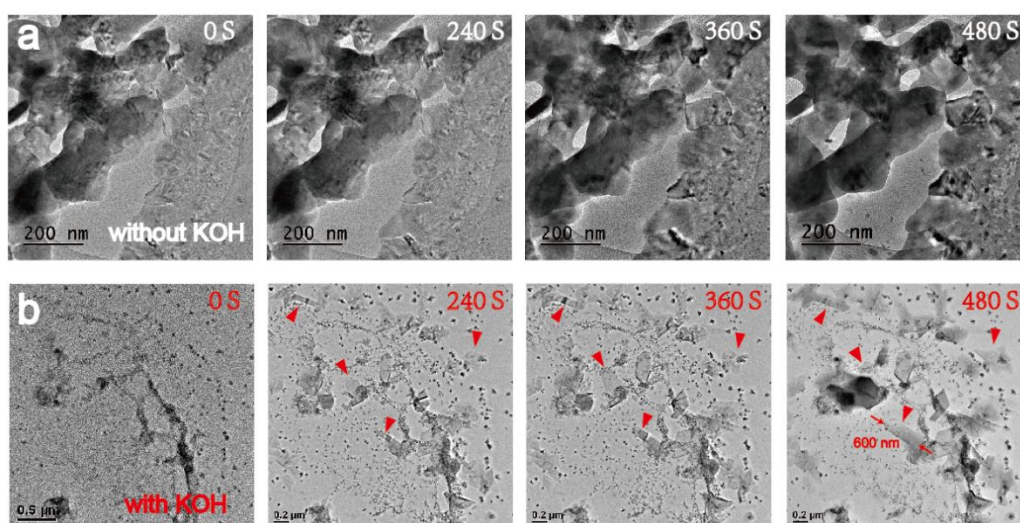

**Figure S8.** Long-time-resolved TEM images of the growth of MoS<sub>2</sub> at 750 °C. As a comparison, (a) MoS<sub>2</sub> grown in precursor solution without KOH, (b) MoS<sub>2</sub> grown in 1 M KOH precursor solution. The length of flake increased from 0 to 600 nm.

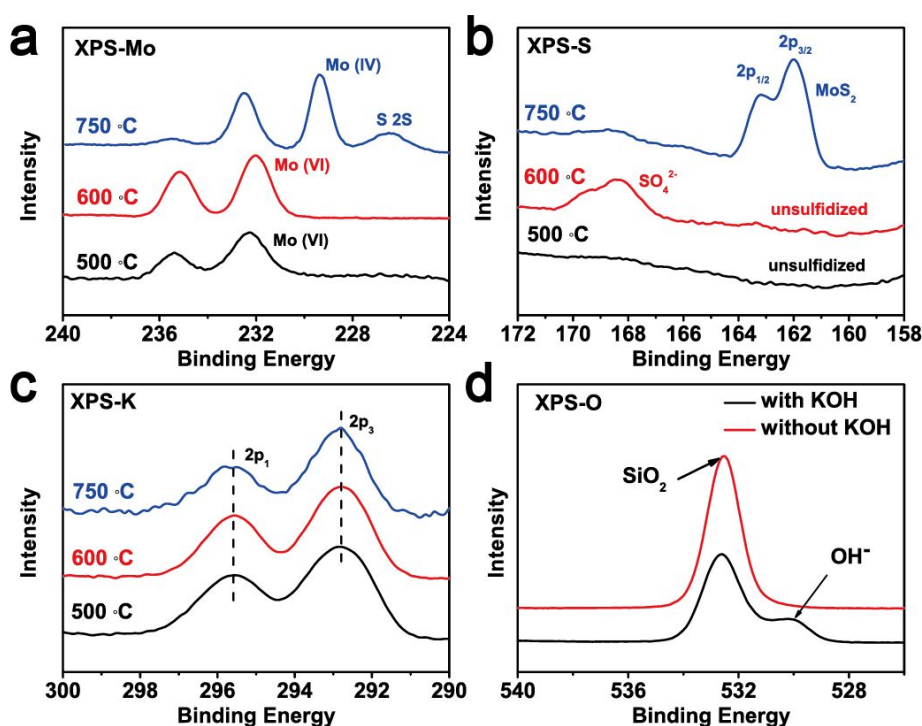

**Figure S9.** XPS spectra of as-grown MoS<sub>2</sub> samples at different temperature in annealing process. (a) Mo 3d, (b) S 2p, (c) K 2p, (d) O peak of the achieved MoS<sub>2</sub>.

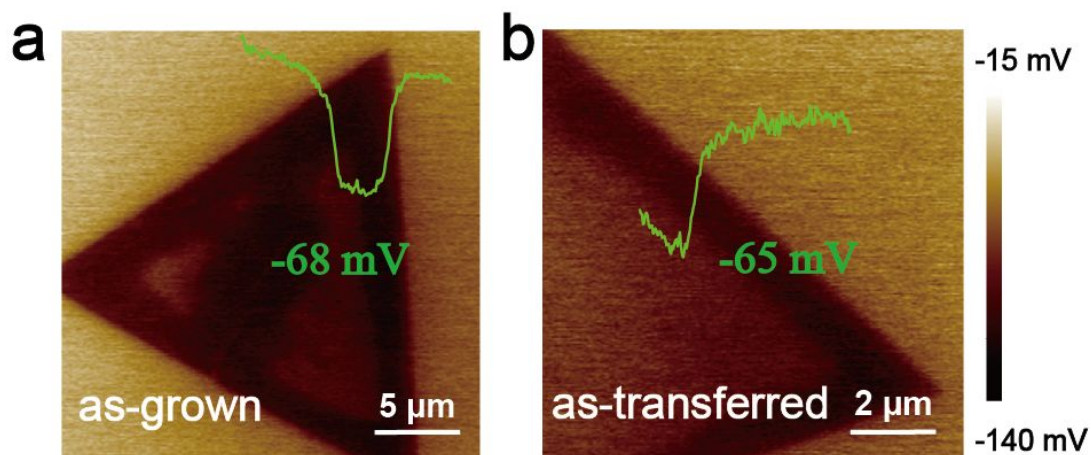

**Figure S10.** KPFM images of direct growth and as-transferred MoS<sub>2</sub> monolayers, respectively.

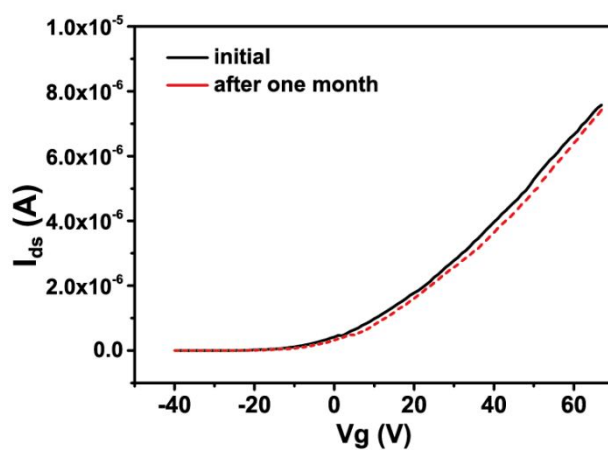

**Figure S11.** Transfer characteristics of the device before (black line) and after one month (red line) in air.

**Supplementary Movie 1.** The evolution of SAED patterns during the crystallization process.

**Supplementary Movie 2.** dynamical behavior of the increased flake at 750 °C.
